# Supplementary material for: Synthesis of Novel Methyl 3-(hetero)arylthieno[3,2-b]pyridine-2-carboxylates and Antitumor Activity Evaluation: Studies In Vitro and In Ovo Grafts of Chick Chorioallantoic Membrane (CAM) with a Triple Negative Breast Cancer Cell Line
Source: PubMed Central journal article supplement (PMC7999514; doi:10.3390/molecules26061594), 2021-03-13

# Synthesis of novel methyl 3-(hetero)arylthieno[3,2-*b*]pyridine-2-carboxylates and antitumor activity evaluation: studies *in vitro* and *in ovo* grafts of Chick Chorioallantoic Membrane (CAM) with a triple negative breast cancer cell line

Bruna R. Silva <sup>1,2,3,#</sup>, Rita Rebelo <sup>2,3,#</sup>, Juliana M. Rodrigues <sup>1</sup>, Cristina P. R. Xavier <sup>2,3\*</sup>, M. Helena Vasconcelos <sup>2,3,4</sup>, Maria-João R. P. Queiroz <sup>1\*</sup>

<sup>1</sup> Centre of Chemistry, University of Minho, 4710-057, Braga, Portugal; mjrpq@quimica.uminho.pt (MJQ); brunadansilva1967@gmail.com (BS); id7018@alunos.uminho.pt (JMR)

<sup>2</sup> Cancer Drug Resistance Group, IPATIMUP - Institute of Molecular Pathology and Immunology, University of Porto, Portugal, 4200-135, Porto, Portugal; rrebelo@ipatimup.pt (RR); cristinax@ipatimup.pt (CPRX); hvasconcelos@ipatimup.pt (MHV)

<sup>3</sup> i3S - Instituto de Investigação e Inovação em Saúde, Universidade do Porto, 4200-135 Porto, Portugal,

<sup>4</sup> Department of Biological Sciences, FFUP - Faculty of Pharmacy of the University of Porto, Porto, Portugal;

\* Correspondence: mjrpq@quimica.uminho.pt (MJRPQ); cristinax@ipatimup.pt (CPRX)

# These authors equally contributed to this work.

## Table of contents

|                                                                                             |     |
|---------------------------------------------------------------------------------------------|-----|
| <sup>1</sup> H and <sup>13</sup> C NMR spectra of compound <b>2a</b> .....                  | S2  |
| <sup>1</sup> H and <sup>13</sup> C NMR spectra of compound <b>2b</b> .....                  | S3  |
| <sup>1</sup> H and <sup>13</sup> C NMR spectra of compound <b>2c</b> .....                  | S4  |
| <sup>1</sup> H, <sup>13</sup> C NMR and <sup>19</sup> F spectra of compound <b>2d</b> ..... | S5  |
| <sup>1</sup> H and <sup>13</sup> C NMR spectra of compound <b>2e</b> .....                  | S7  |
| <sup>1</sup> H and <sup>13</sup> C NMR spectra of compound <b>2f</b> .....                  | S8  |
| <sup>1</sup> H and <sup>13</sup> C NMR spectra of compound <b>2g</b> .....                  | S9  |
| <sup>1</sup> H and <sup>13</sup> C NMR spectra of compound <b>2h</b> .....                  | S10 |

# Methyl 3-phenylthieno[3,2-*b*]pyridine-2-carboxylate (**2a**)

$^1\text{H}$  NMR (DMSO- $d_6$ , 400 MHz) of compound **2a**

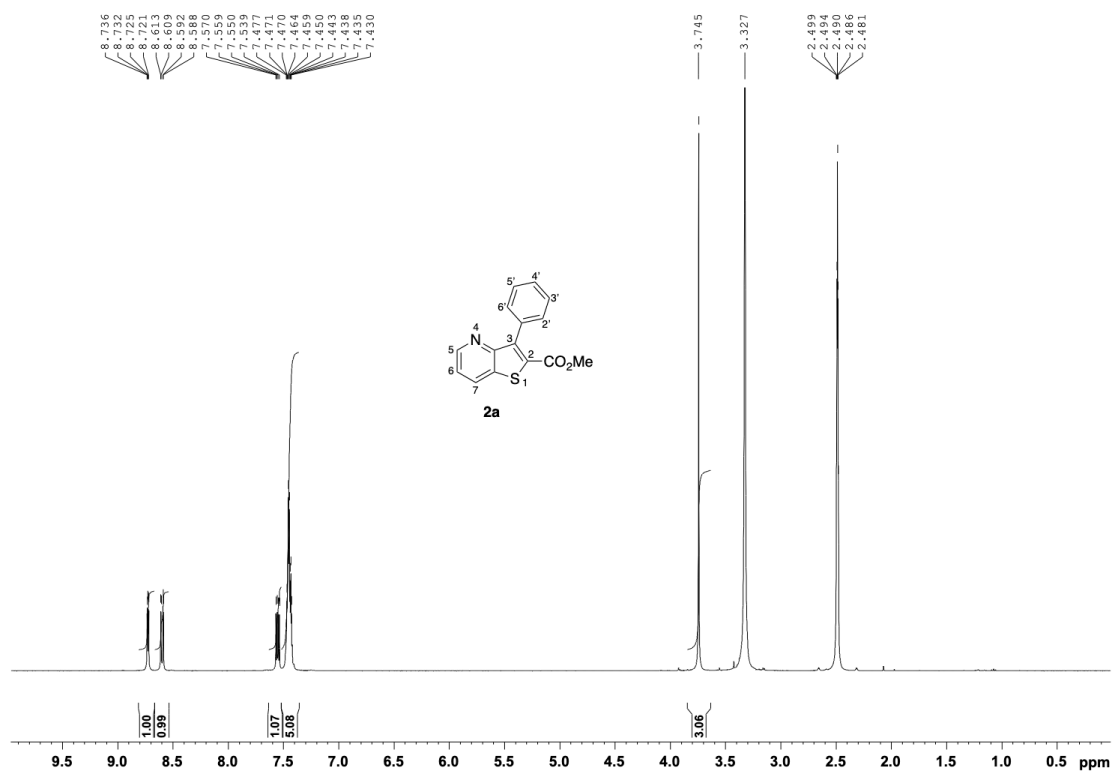

$^{13}\text{C}$  NMR (DMSO- $d_6$ , 100.6 MHz) of compound **2a**

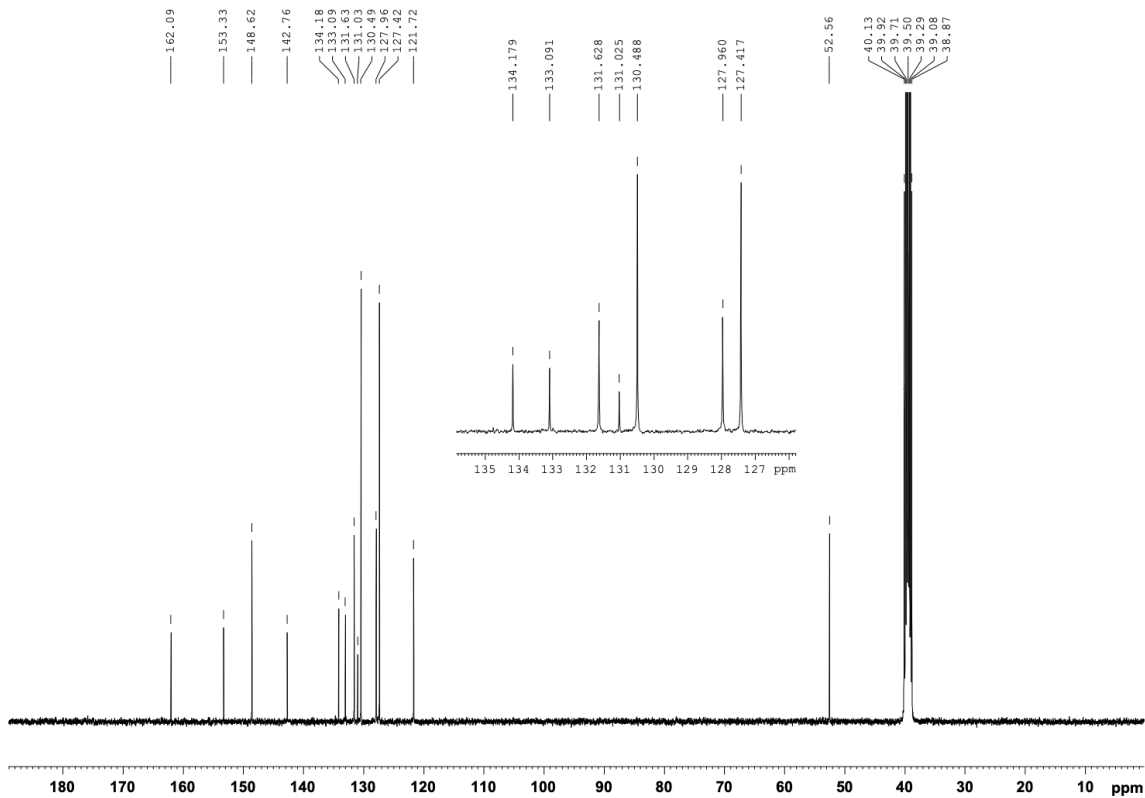

## Methyl 3-(*p*-tolyl)thieno[3,2-*b*]pyridine-2-carboxylate (**2b**)

<sup>1</sup>H NMR (CDCl<sub>3</sub>, 400 MHz) of compound **2b**

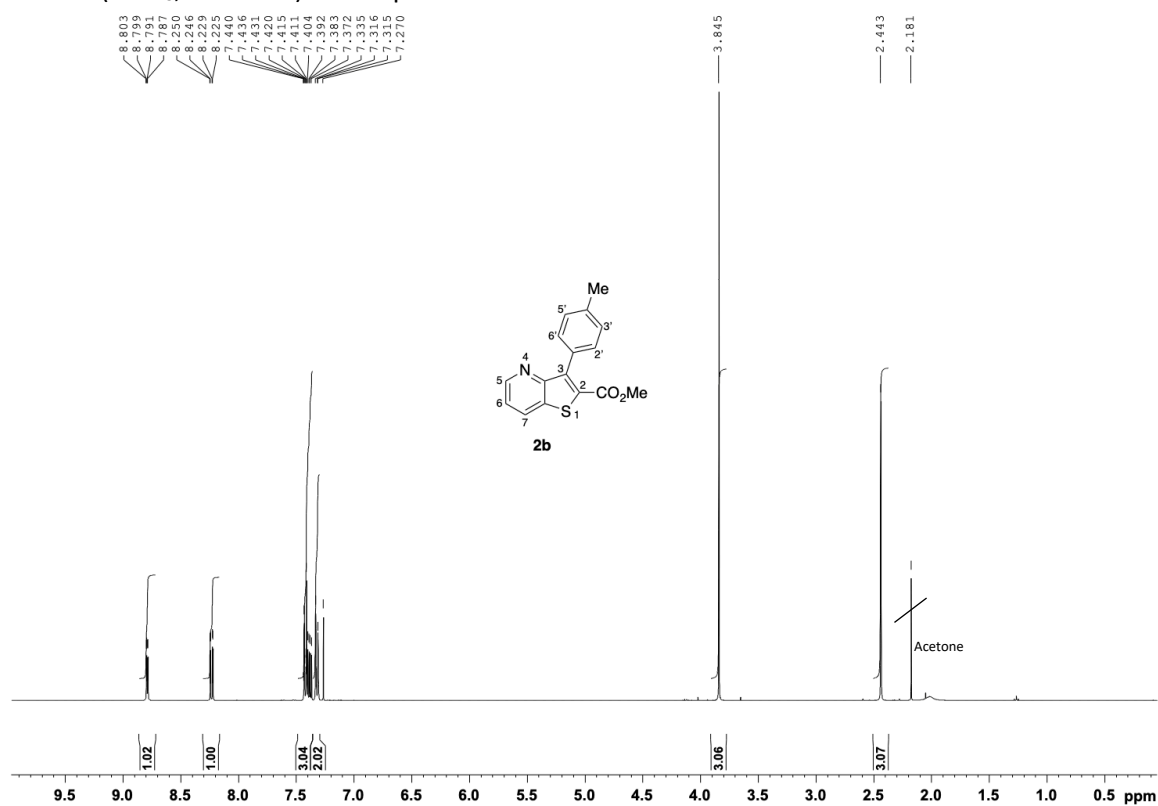

<sup>13</sup>C NMR (CDCl<sub>3</sub>, 100.6 MHz) of compound **2b**

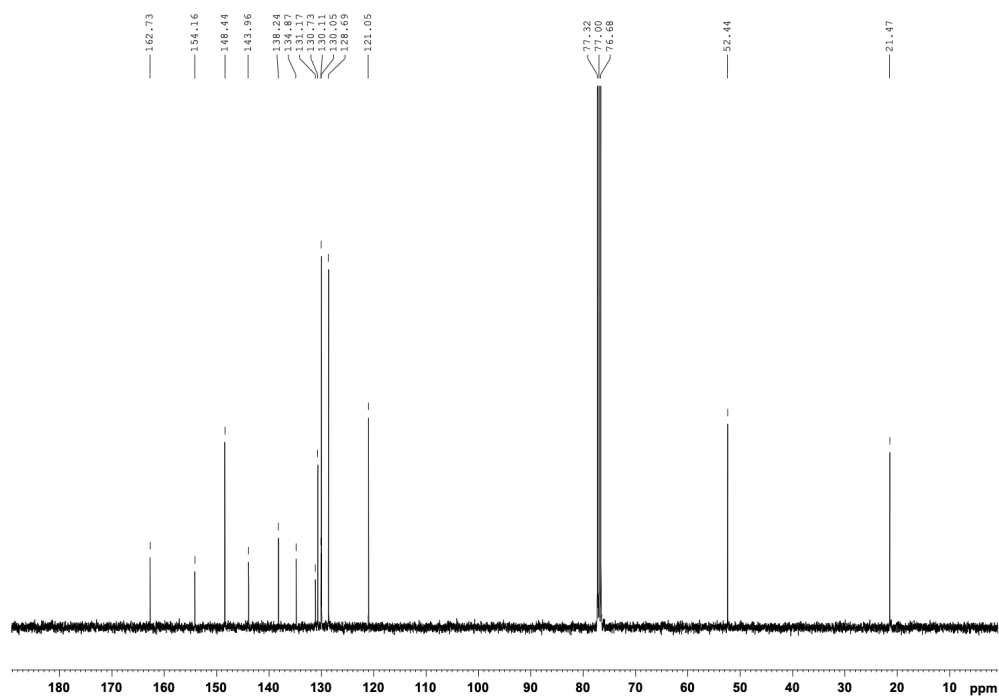

# Methyl 3-(4-methoxyphenyl)thieno[3,2-b]pyridine-2-carboxylate (2c)

<sup>1</sup>H NMR (CDCl<sub>3</sub>, 400 MHz) of compound 2c

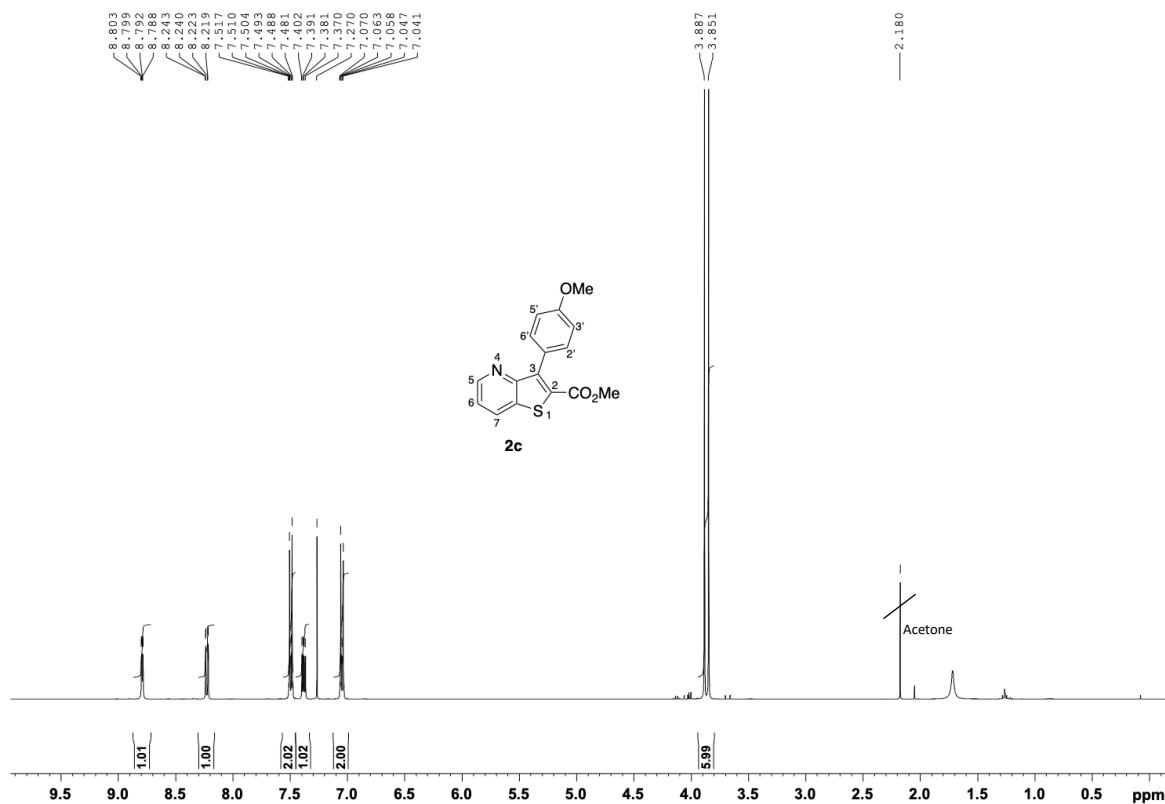

<sup>13</sup>C NMR (CDCl<sub>3</sub>, 100.6 MHz) of compound 2c

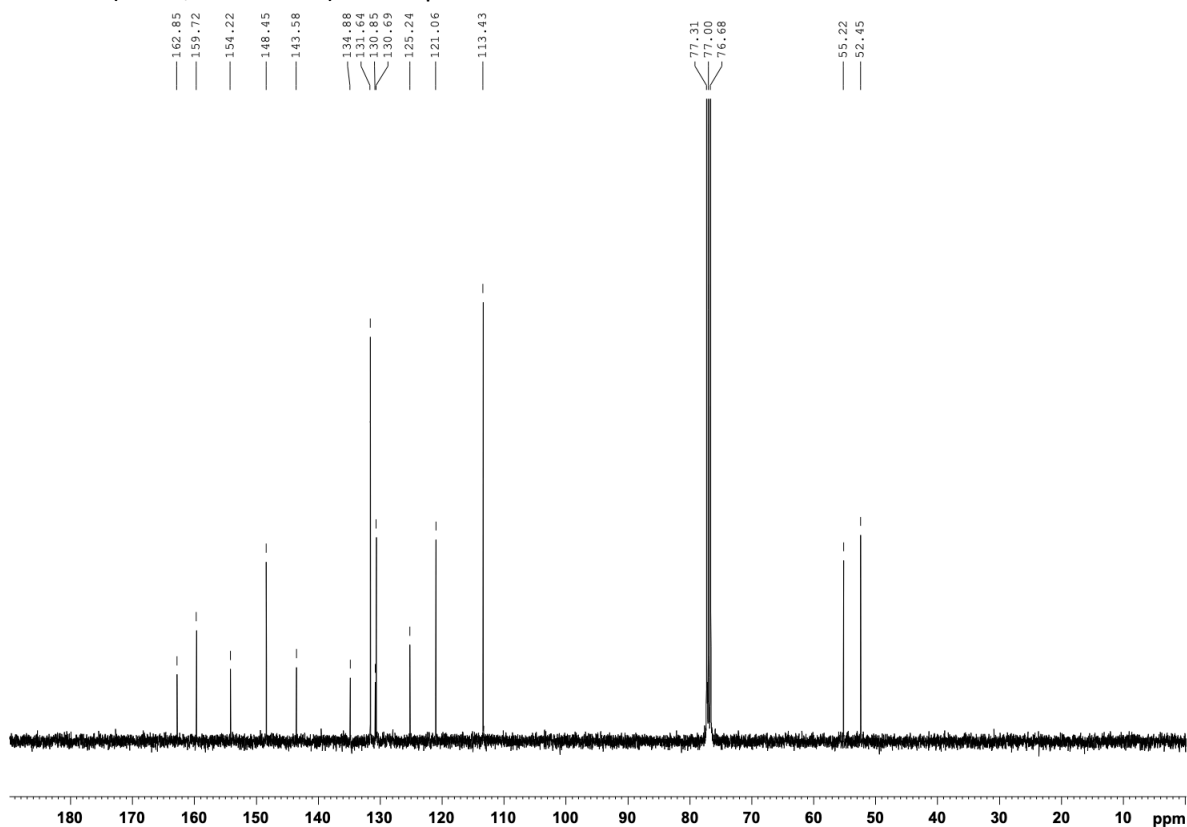

# Methyl 3-[4-(trifluoromethyl)phenyl]thieno[3,2-*b*]pyridine-2-carboxylate (2d)

<sup>1</sup>H NMR (CDCl<sub>3</sub>, 400 MHz) of compound 2d

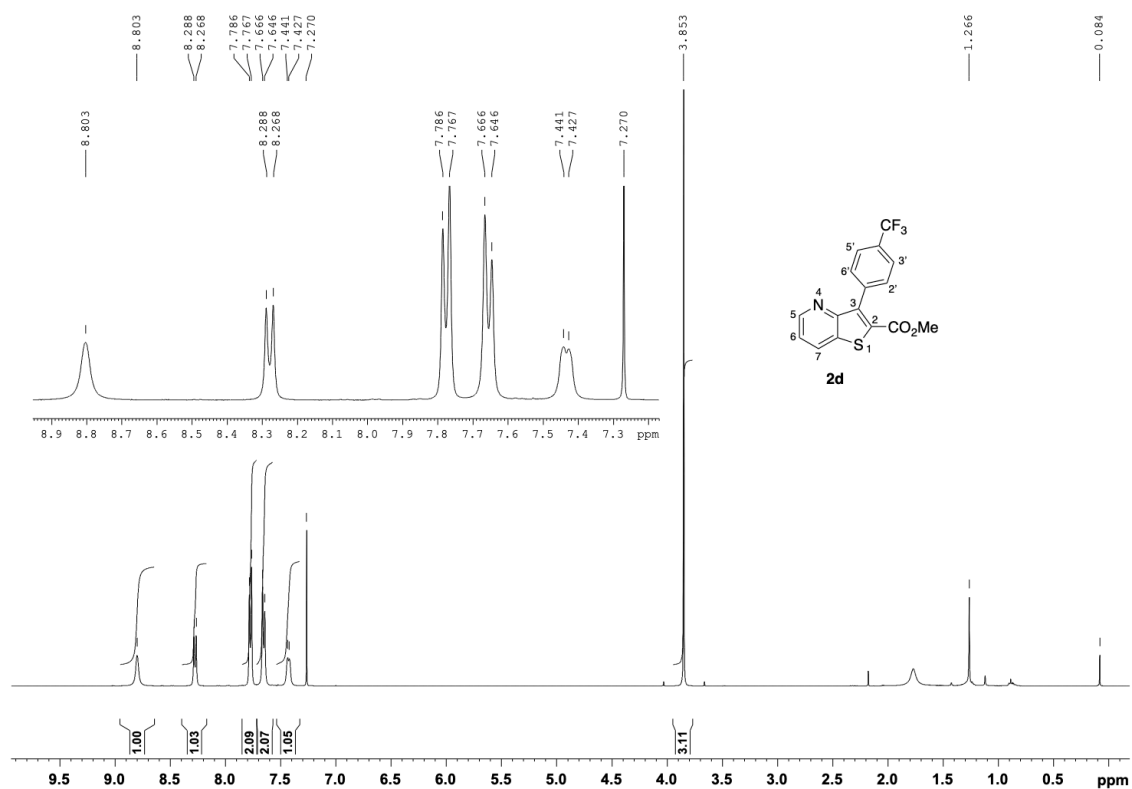

<sup>13</sup>C NMR (CDCl<sub>3</sub>, 100.6 MHz) of compound 2d

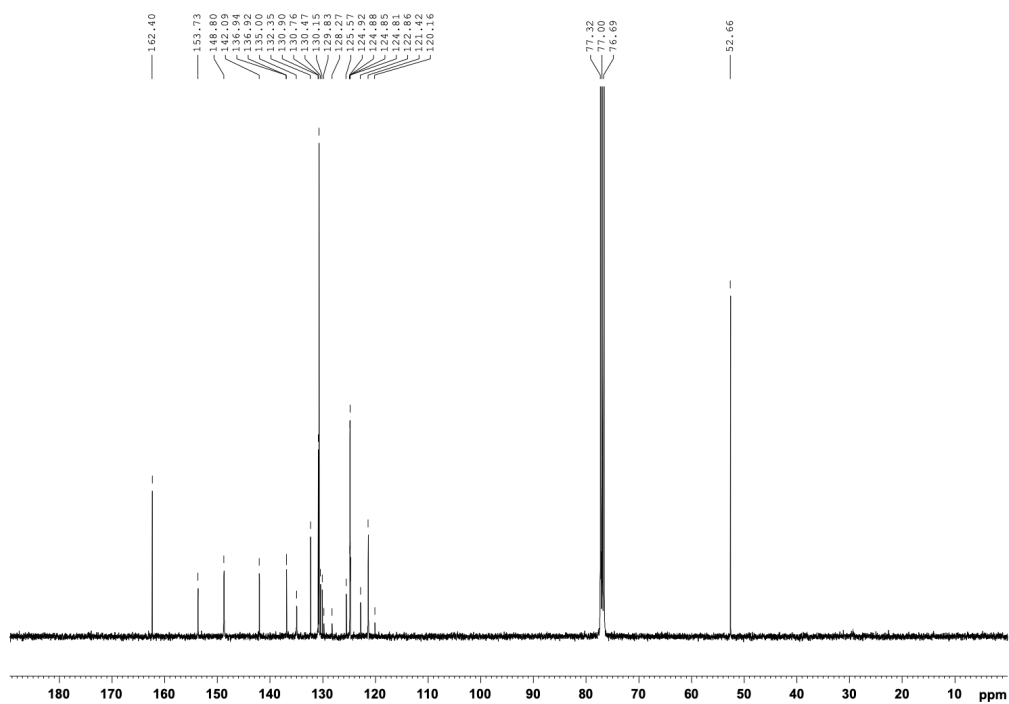

$^{19}\text{F}$  NMR ( $\text{CDCl}_3$ , 376.48 MHz) of compound **2d**

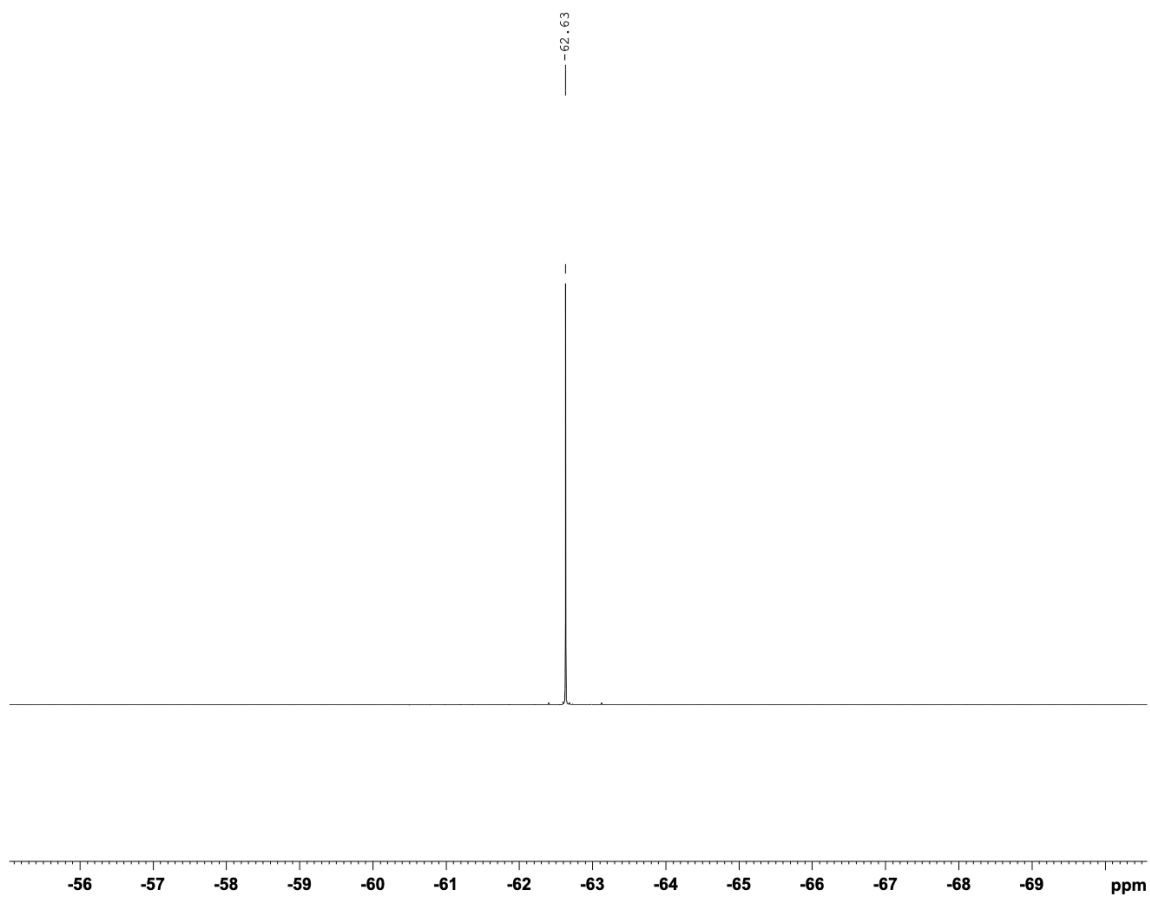

# Methyl 3-(4-chlorophenyl)thieno[3,2-b]pyridine-2-carboxylate (2e)

<sup>1</sup>H NMR (CDCl<sub>3</sub>, 400 MHz) of compound 2e

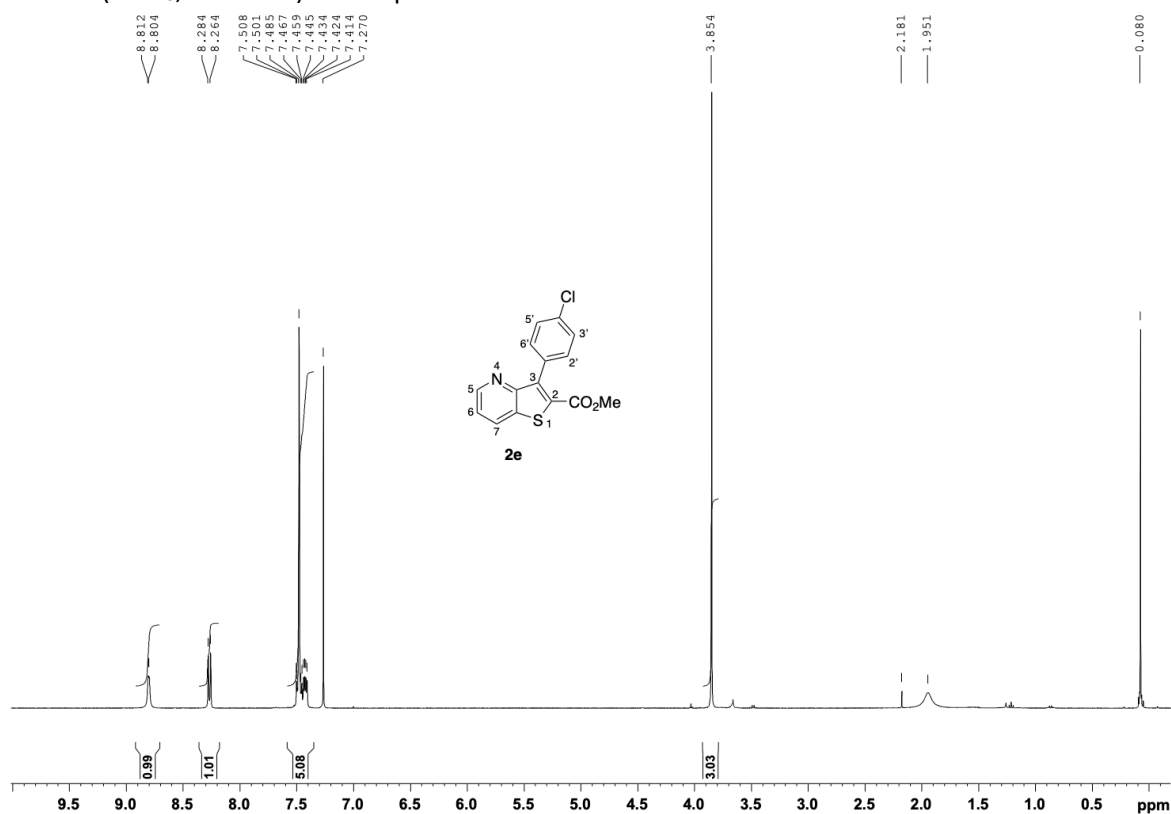

<sup>13</sup>C NMR (CDCl<sub>3</sub>, 100.6 MHz) of compound 2e

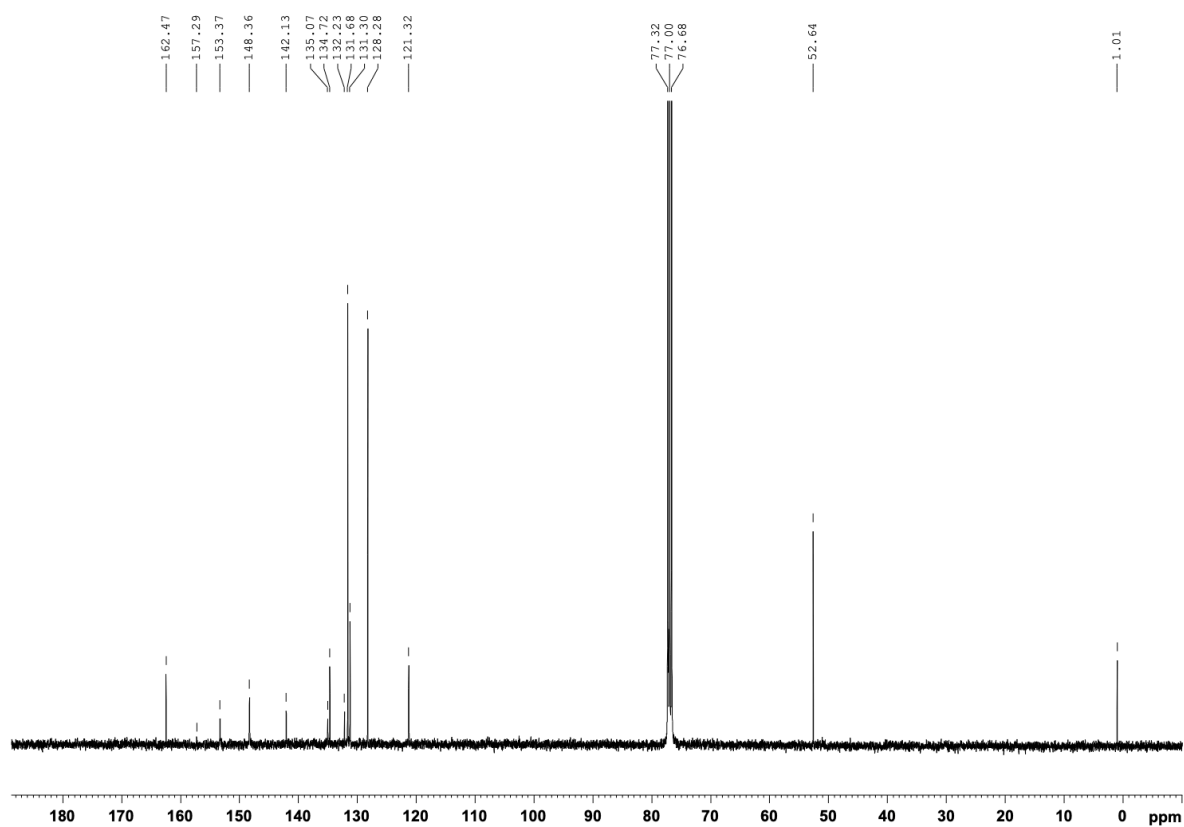

# Methyl 3-(4-cyanophenyl)thieno[3,2-b]pyridine-2-carboxylate (2f)

<sup>1</sup>H NMR (CDCl<sub>3</sub>, 400 MHz) of compound 2f

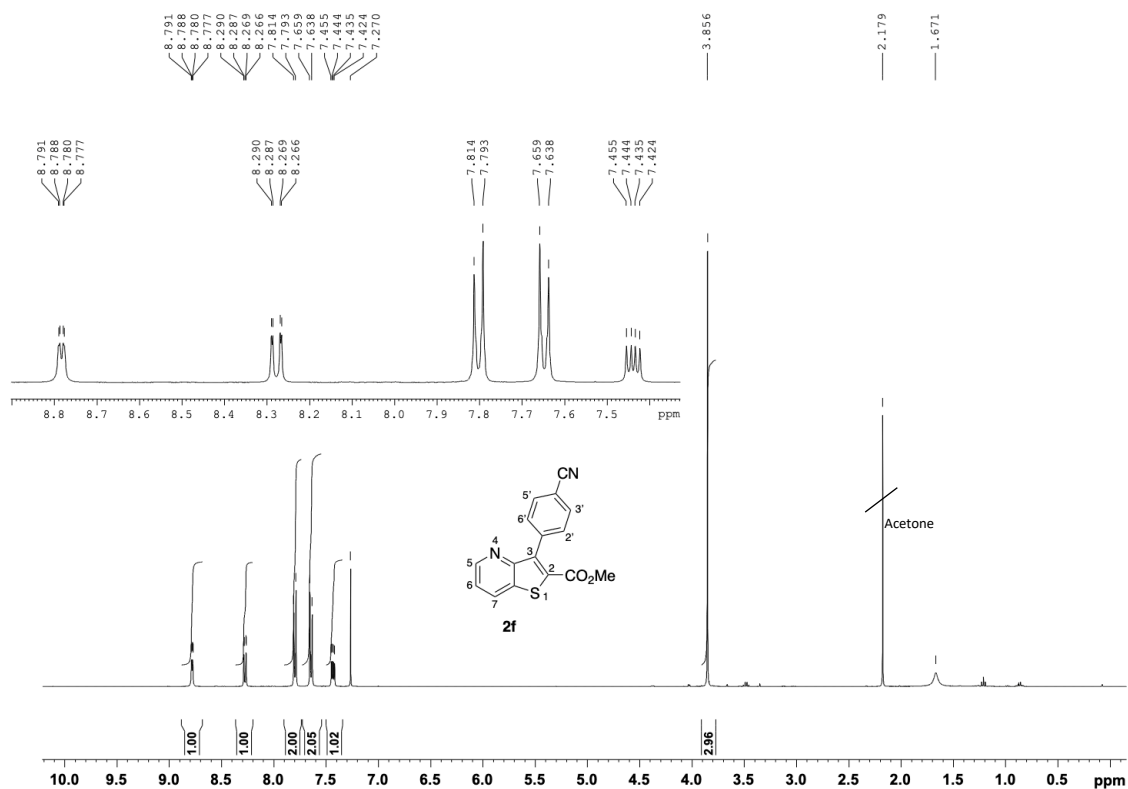

<sup>13</sup>C NMR (CDCl<sub>3</sub>, 100.6 MHz) of compound 2f

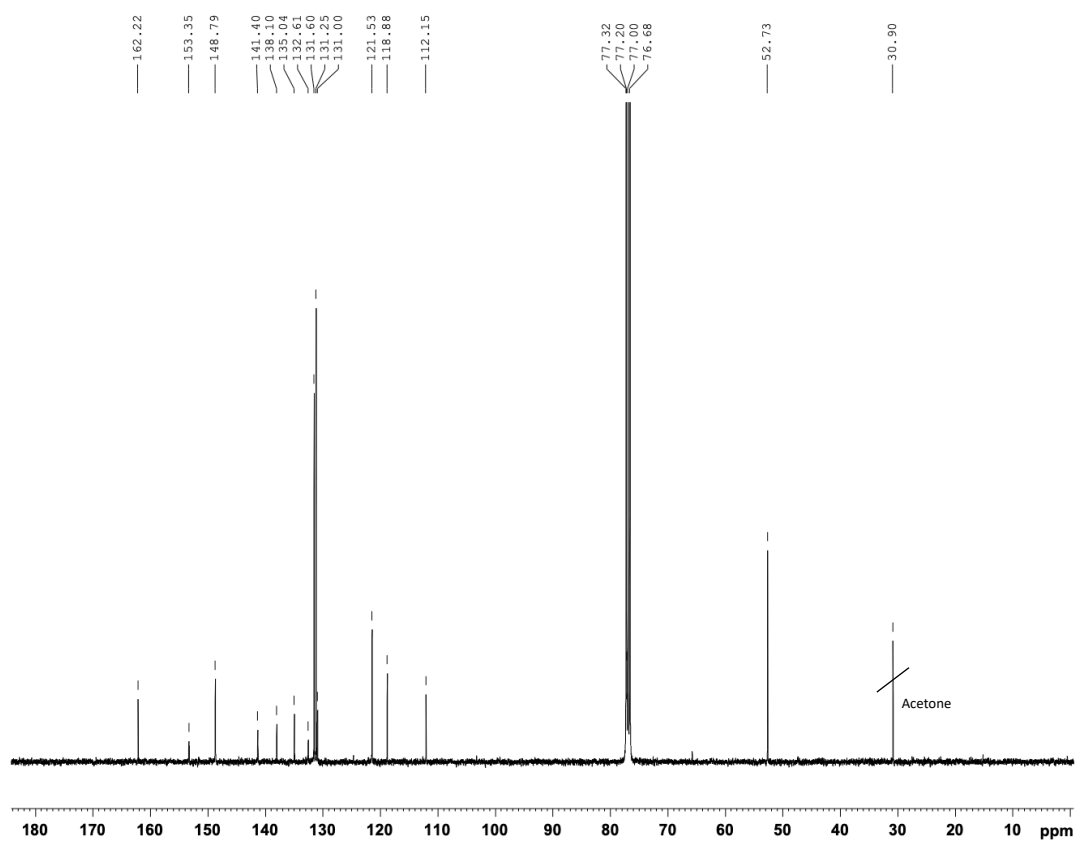



### Methyl 3-(pyridin-4-yl)thieno[3,2-*b*]pyridine-2-carboxylate (2g)

<sup>1</sup>H NMR (CDCl<sub>3</sub>, 400 MHz) of compound **2g**

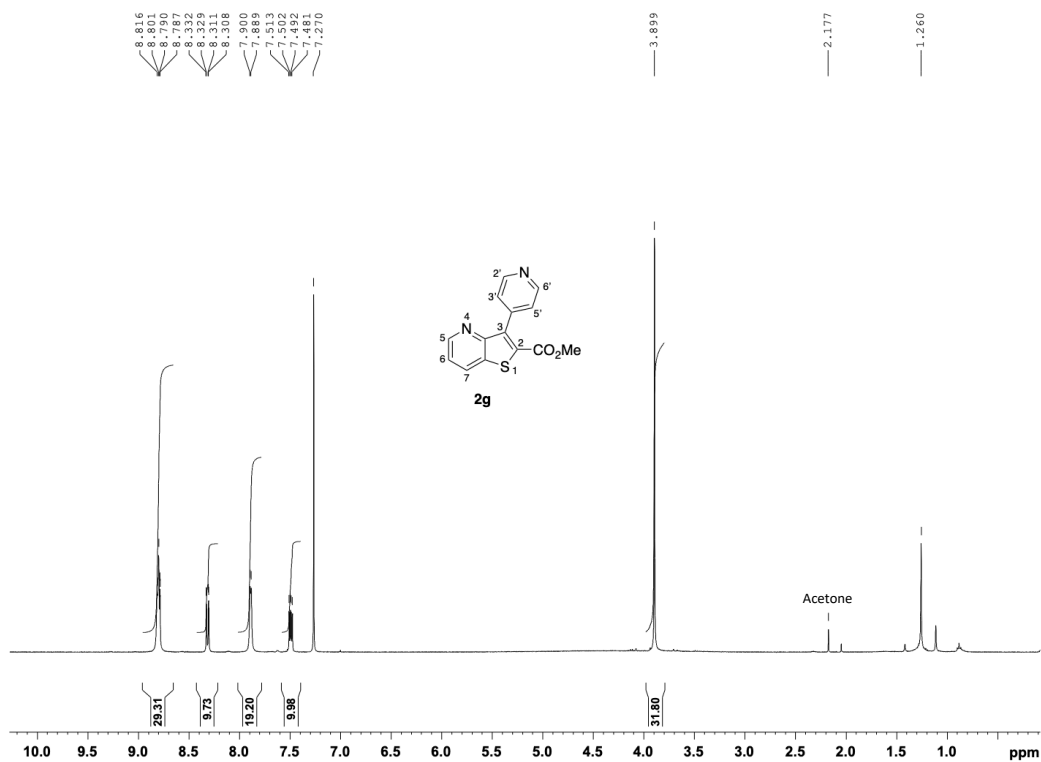

<sup>13</sup>C NMR (CDCl<sub>3</sub>, 100.6 MHz) of compound **2g**

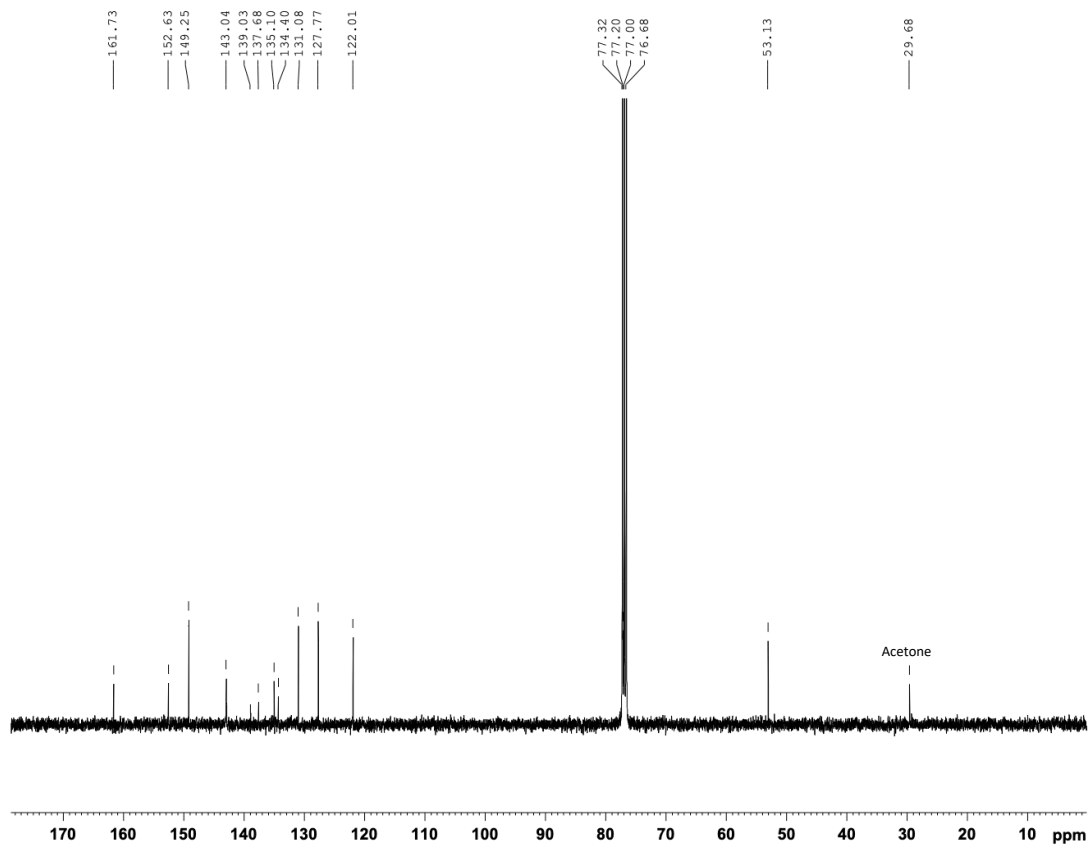

### Methyl 3-(furan-3-yl)thieno[3,2-*b*]pyridine-2-carboxylate (2h)

<sup>1</sup>H NMR (CDCl<sub>3</sub>, 400 MHz) of compound **2h**

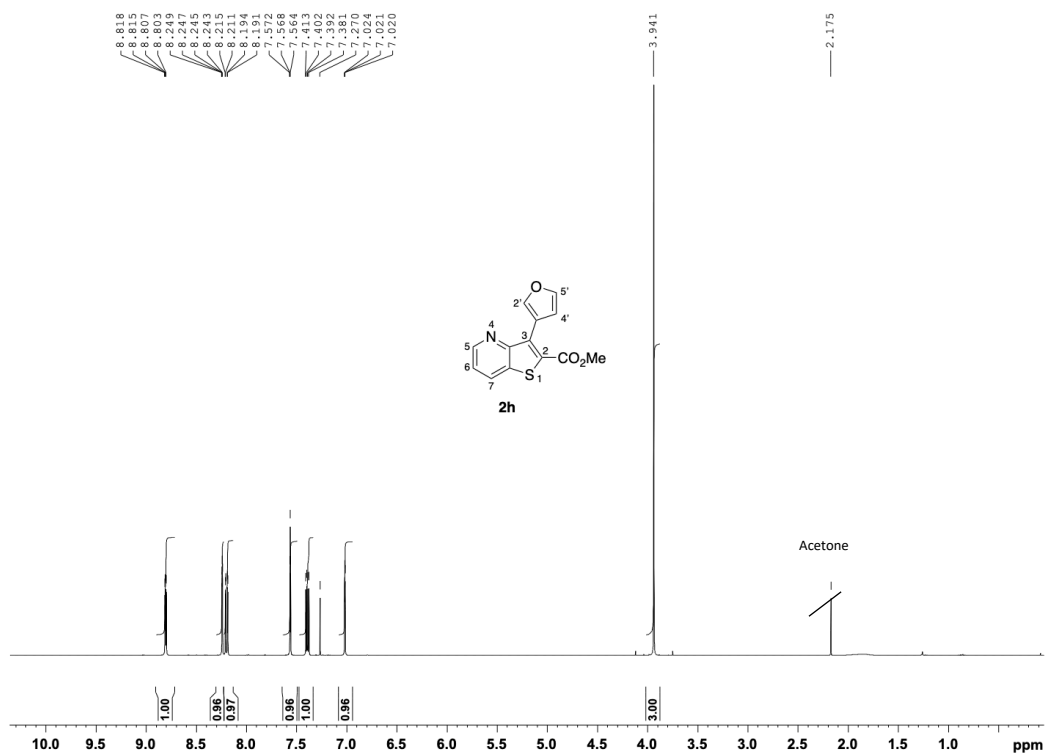

<sup>13</sup>C NMR (CDCl<sub>3</sub>, 100.6 MHz) of compound **2h**

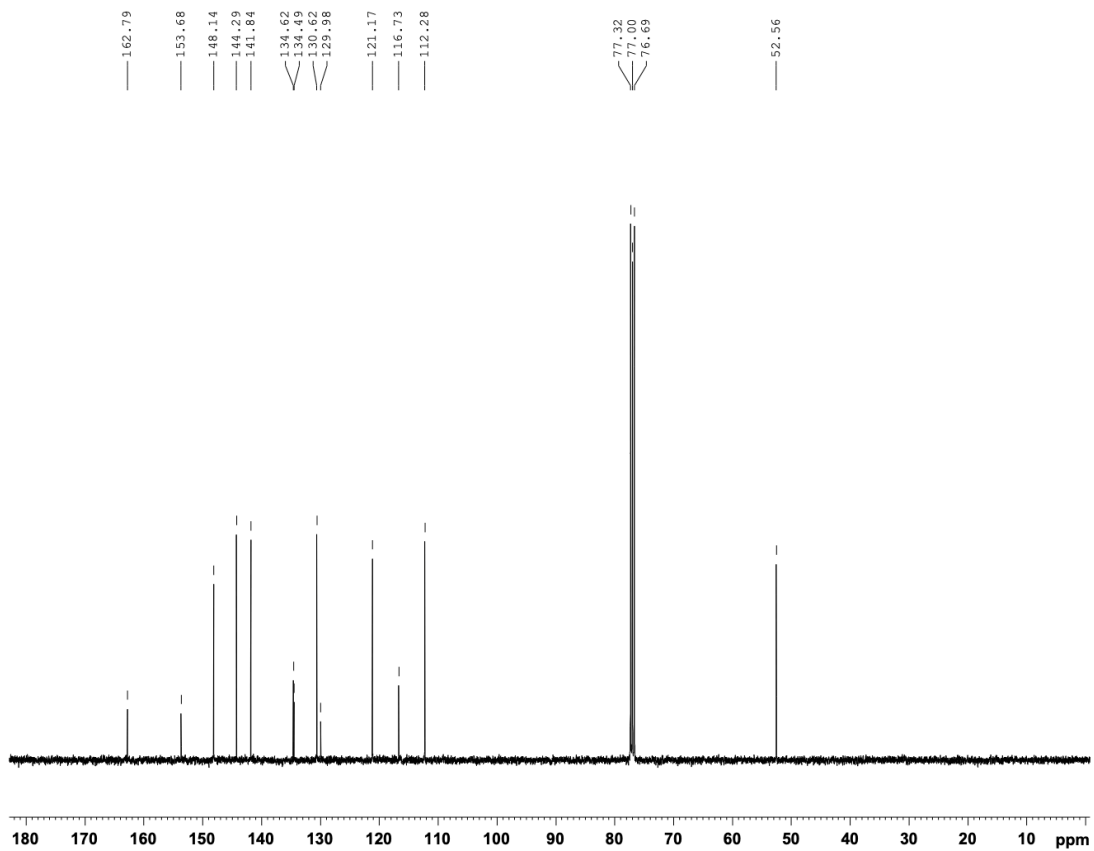

Supplement: molecules-26-01594-s001.pdf [file molecules-26-01594-s001.pdf]
